# Supplementary material for: Transfer of environmental signals from surface to the underground at Ascunsă Cave, Romania
Source: Copernicus journal article supplement (doi:10.5194/hess-2016-625), 2017-01-04
Supplement: Supplementary file 1 [file hess-2016-625-supplement.pdf]

**Annex I. Supplementary material** for Dragusin et al. - Transfer of environmental signals from surface to the underground at Ascunsă Cave, Romania

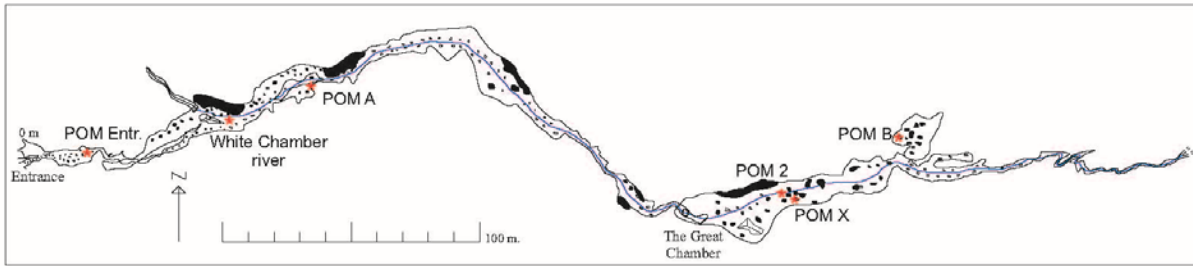

**Figure S1. Map of Ascunsă Cave with location of monitoring points.**

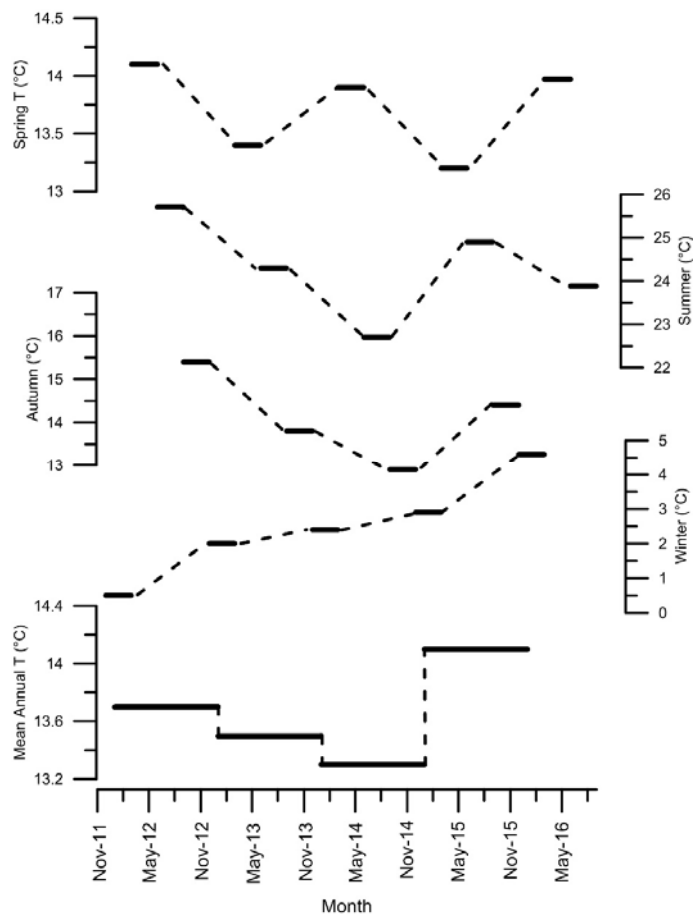

**Figure S2. Annual and seasonal temperature averages at Drobeta since 2012.**

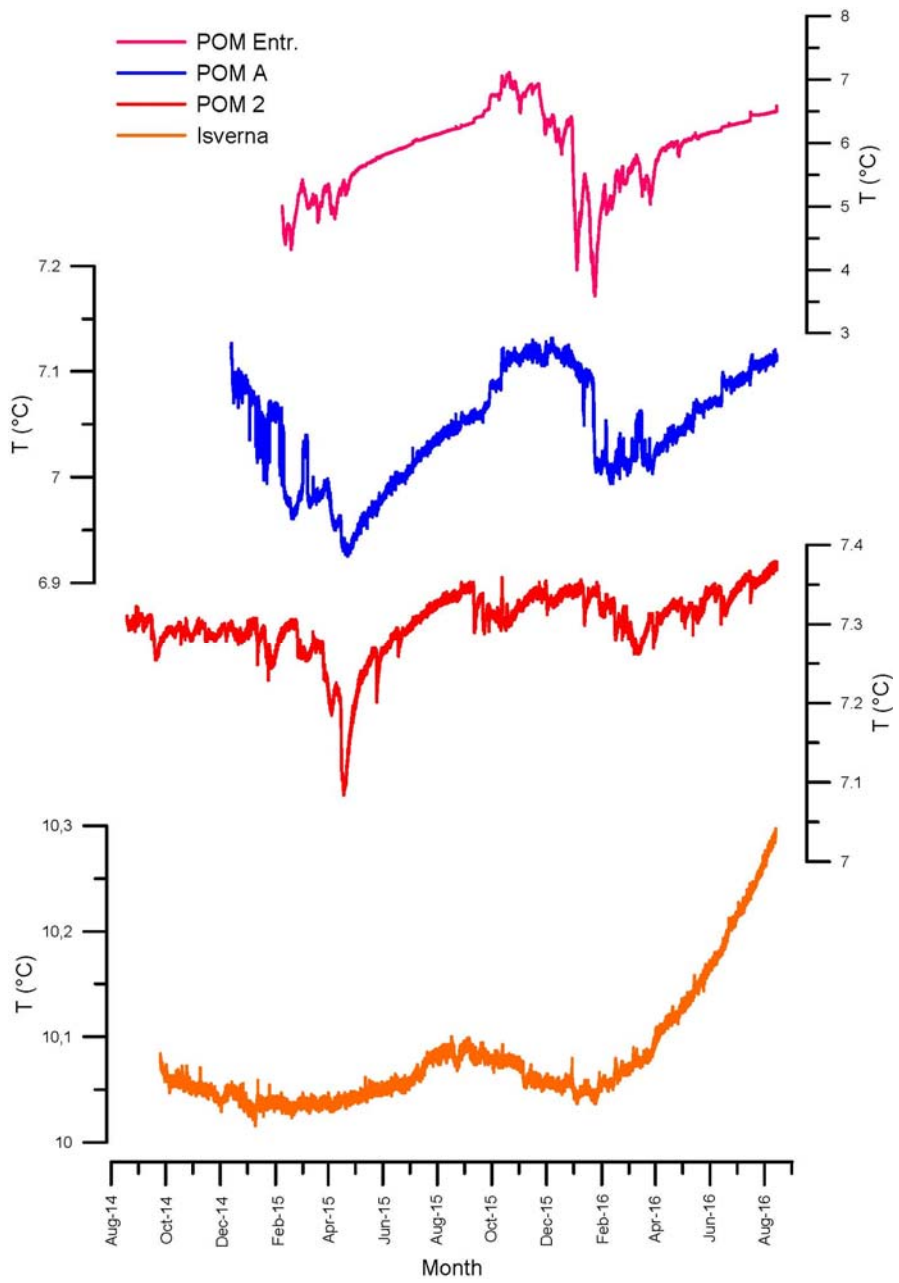

**Figure S3. Temperature variability inside Ascunsă and Isverna caves.**

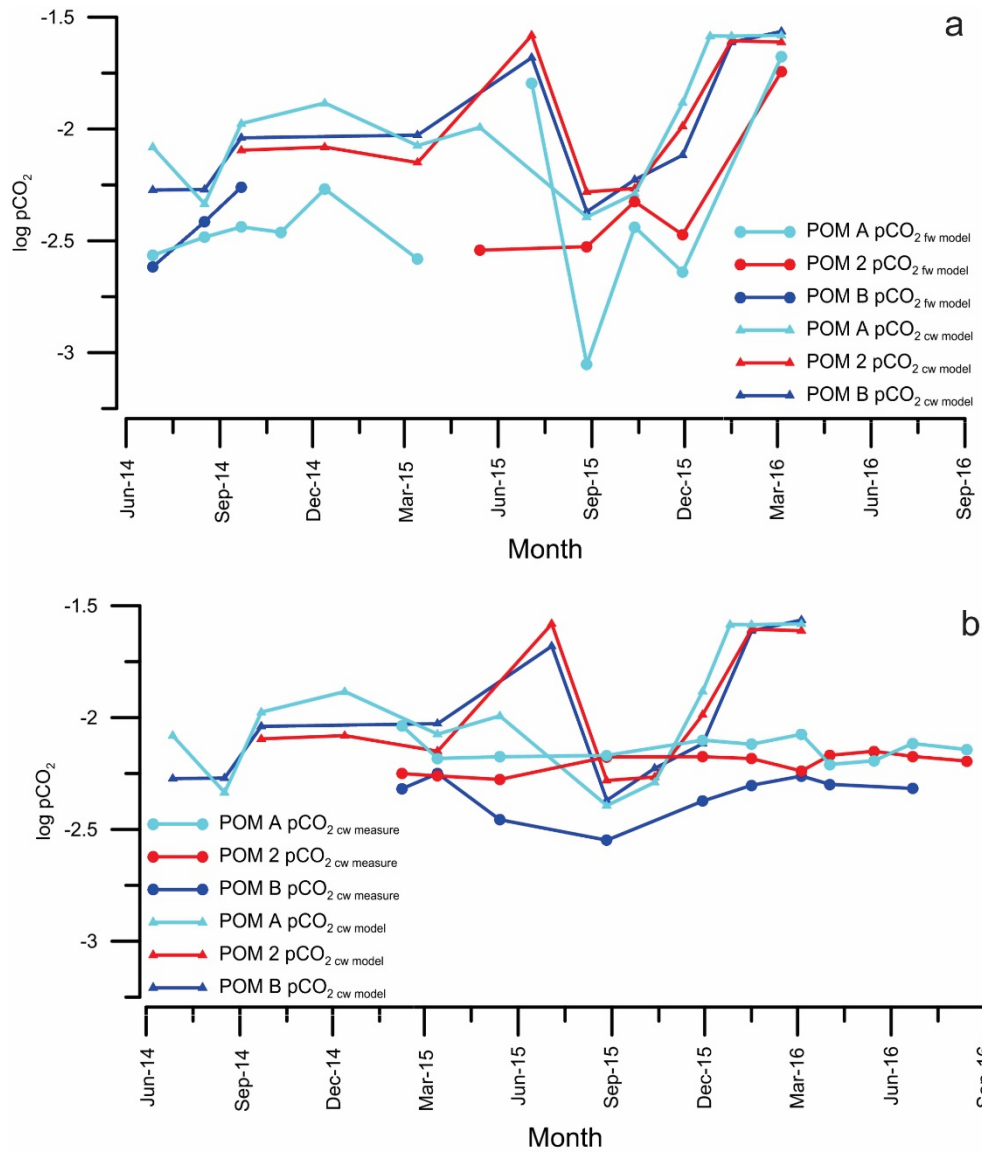

**Figure S4. Comparison between (a)  $\text{CO}_{2\text{fw}}$  model and  $\text{CO}_{2\text{cw}}$  model and (b)  $\text{CO}_{2\text{cw}}$  model and  $\text{CO}_{2\text{cw}}$  measure.**

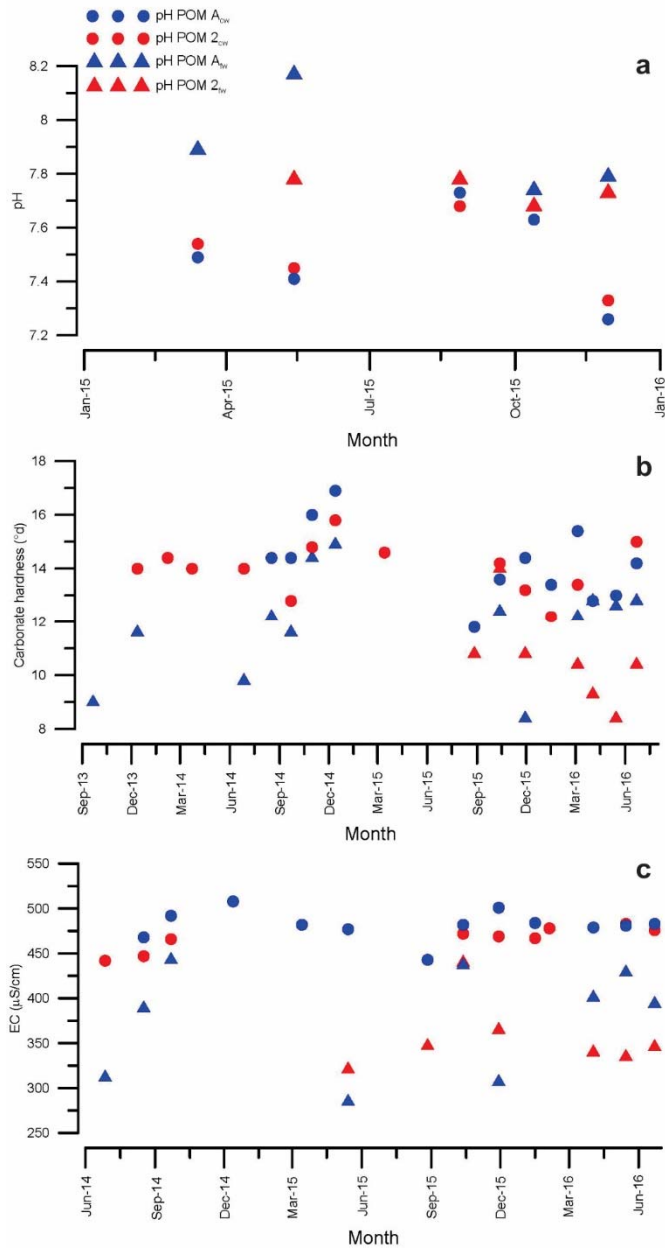

**Figure S5. Comparison between pool and confined waters: (a) pH, (b) carbonate hardness and (c) electrical conductivity.**

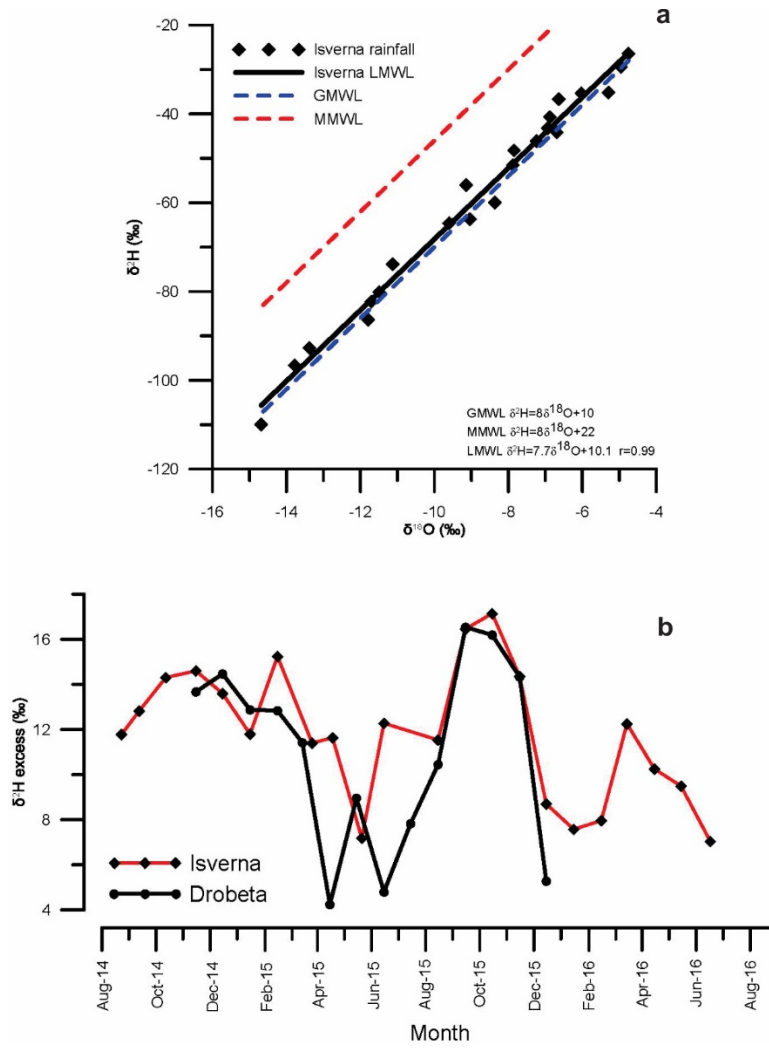

Figure S6. Comparison of (a) the GMWL (Craig, 1961), MMWL (Gat and Carmi, 1970) and LMWL and (b) d-excess values at Isverna and Drobeta.

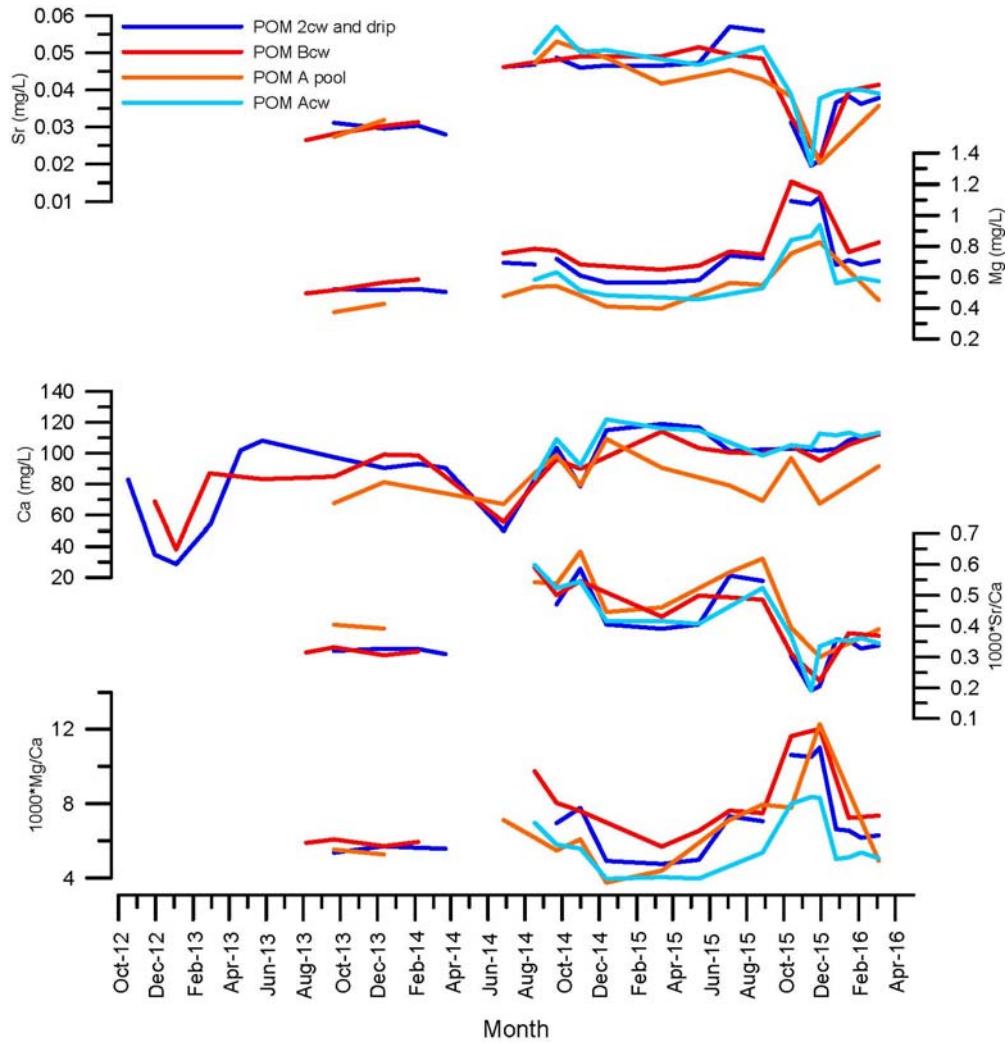

**Figure S7. Concentrations of Ca, Mg and Sr in waters from Ascunsă Cave, as well as their ratios, Sr/Ca and Mg/Ca.**

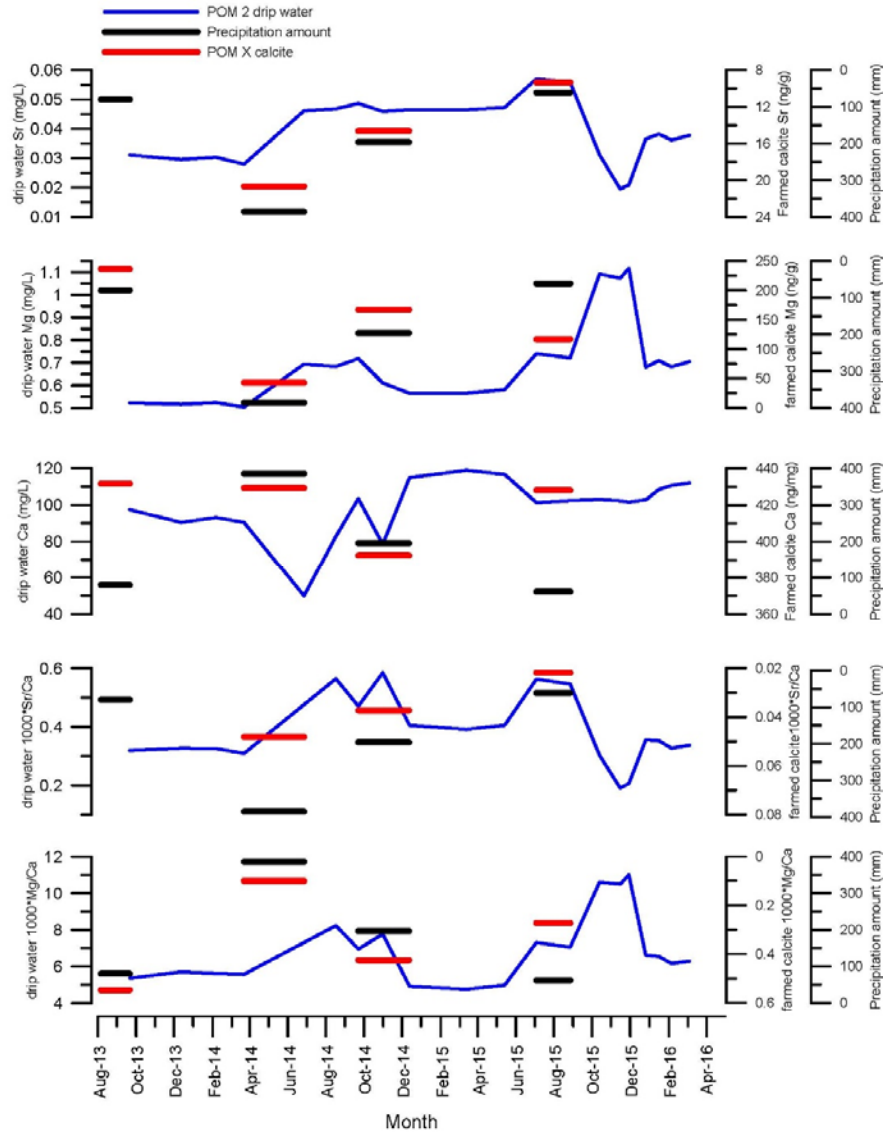

**Figure S8. Comparison between Drobeta precipitations, POM X farmed calcite chemistry and POM 2 drip water chemistry.**
